# Supplementary material for: The Isolation of Culturable Bacteria in Ixodes ricinus Ticks of a Belgian Peri-Urban Forest Uncovers Opportunistic Bacteria Potentially Important for Public Health
Source: MDPI journal article supplement (doi:10.3390/ijerph182212134), 2021-11-19
Supplement: s1 [file s1]

## Article

# The isolation of culturable bacteria in *Ixodes ricinus* ticks of a Belgian peri-urban forest uncovers opportunistic bacteria potentially important for public health.

## Supplementary Materials:

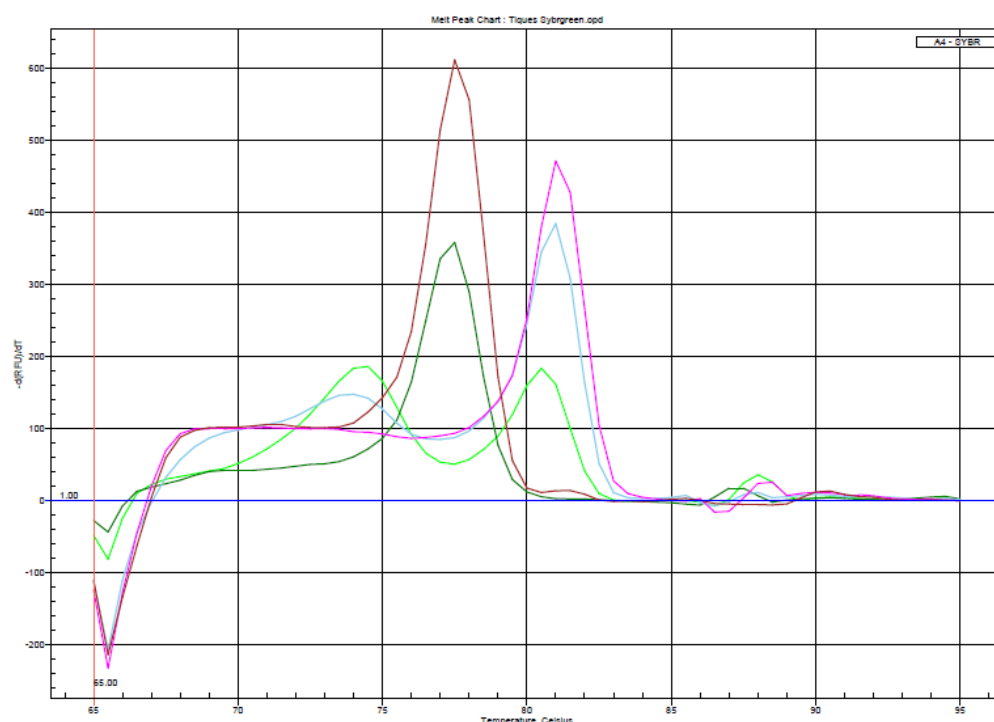

**Figure S1.** Melting curves derived from analysis of the 5S and ITS2 sequence polymorphisms in *Ixodes* and *Dermacentor* spp. by HRMA. Derivative fluorescent emission data recorded during the melting step. Two main profiles were observed with different Tms, the *Ixodes* spp. group (dark green and brown lines) and the *Dermacentor* spp. group (green, light blue and fuchsia lines). Primers designed for the analysis: primers on 5S for *Ixodes ricinus*: FW: gtcgtagccttcgtagtc, RV: acggcattccctactggat; primers on ITS2 for *Dermacentor* spp: FW: cggacacctgcaggaaag, RV: ctccgactctctcgaaac

**Table S1.** Pools tested for the isolation and identification of cultivable bacteria by site, season, and tick development stage. Excel file in the online material.

**Table S2.** List of resistance genes and of their orthologs present in the tick-derived *C. davisae* genome as defined with the KAAS analysis.

| Resistance         | Resistance genes encoded in <i>C. davisae</i> genome                                                                                                                                                                                                                                                                                                                                                             | Orthologs                                                                                                         |
|--------------------|------------------------------------------------------------------------------------------------------------------------------------------------------------------------------------------------------------------------------------------------------------------------------------------------------------------------------------------------------------------------------------------------------------------|-------------------------------------------------------------------------------------------------------------------|
| <b>β-Lactam</b>    |                                                                                                                                                                                                                                                                                                                                                                                                                  |                                                                                                                   |
| Methicillin        | mecR1; methicillin resistance protein<br>mecI; methicillin resistance regulatory protein<br>mecA; penicillin-binding protein 2 prime                                                                                                                                                                                                                                                                             | K02547<br>K02546<br>K02545                                                                                        |
| Bla system         | blaR1; bla regulator protein blaR1<br>blaI; BlaI family transcriptional regulator, penicillinase repressor<br>blaZ; beta-lactamase class A BlaZ<br>penP; beta-lactamase class A                                                                                                                                                                                                                                  | K02172<br>K02171<br>K18766<br>K17836                                                                              |
| Imipenem           | ParR/ParS two-component system<br>CusR/CusS two-component system<br>mexT; LysR family transcriptional regulator<br>oprD; imipenem/basic amino acid-specific outer membrane pore                                                                                                                                                                                                                                  | K18073/ K18072<br>K07665/ K07644<br>K18297<br>K18093                                                              |
| <b>Vancomycin</b>  |                                                                                                                                                                                                                                                                                                                                                                                                                  |                                                                                                                   |
| D-Ala-D-Ser type   | vanRE/vanSE; two-component system, OmpR family<br>vanT; serine/alanine racemase<br>vanC; D-alanine---D-serine ligase<br>vanXY; D-alanyl-D-alanine dipeptidase/carboxypeptidase                                                                                                                                                                                                                                   | K18349/K18350<br>K18348<br>K18856<br>K18866                                                                       |
| D-Ala-D-Lac type   | vanRB/vanSB; two-component system, OmpR family<br>vanY; D-alanyl-D-alanine carboxypeptidase<br>vanW; vancomycin resistance protein<br>vanRAc/vanSAc; two-component system, OmpR family<br>vanK; vancomycin resistance protein VanK<br>vanJ; vancomycin resistance protein VanJ<br>vanH; D-specific alpha-keto acid dehydrogenase<br>vanB; D-alanine---(R)-lactate ligase<br>vanX; D-alanyl-D-alanine dipeptidase | K18344/K18345<br>K07260<br>K18346<br>K18352/K18351<br>K18354<br>K18353<br>K18347<br>K15739<br>K08641              |
| Other              | mgrA; MarR family transcriptional regulator, multiple gene regulator MgrA<br>tetB; MFS transporter, DHA2 family, metal-tetracycline-proton antiporter                                                                                                                                                                                                                                                            | K18906<br>K08168                                                                                                  |
| <b>CAMP</b>        |                                                                                                                                                                                                                                                                                                                                                                                                                  |                                                                                                                   |
| dltABCD operon     | graR;grasS; two-component system, OmpR family<br>dltA; D-alanine--poly(phosphoribitol) ligase subunit 1<br>dltB; membrane protein involved in D-alanine export<br>dltC; D-alanine--poly(phosphoribitol) ligase subunit 2<br>dltD; D-alanine transfer protein<br>mprF, fmtC; phosphatidylglycerol lysyltransferase                                                                                                | K19078/K19077<br>K03367<br>K03739<br>K14188<br>K03740<br>K14205                                                   |
| VraFG transporter  | vraF/vraG; cationic antimicrobial peptide transport system ATP-binding protein                                                                                                                                                                                                                                                                                                                                   | K19079/ K19080                                                                                                    |
| protease PgtE      | PhoP/PhoQ two-component system, OmpR family                                                                                                                                                                                                                                                                                                                                                                      | K07660/K07637                                                                                                     |
| <b>Miscellanea</b> |                                                                                                                                                                                                                                                                                                                                                                                                                  |                                                                                                                   |
| Efflux pumps       | MexAB-OprM, MexCD-OprJ,,MexEF-OprN, MexJK-OprM, MexXY-OprM, MexPQ-OpmE, AdeABC, AcrEF-TolC, MdtEF-TolC, BpeEF-OprC, AbcA, NorB, QacA, MepA, repression of porin OmpF                                                                                                                                                                                                                                             | K18131/ K03585/ K18138/<br>K18139/K18294/ K18295/<br>K18296/ K08721/ K18297/<br>K18298/ K18299/ K18300/<br>K18301 |

**Table S3.** Previous scientific publications describing culturable bacteria in *Ixodes* ticks. T. stands for ticks, L. for larvae, N for nymphs, A for adults, M for males and F for females. NA stands for not available.

| Year(s)<br>(seasons)           | Sites (country)                                      | Bacteria                                                                                                                                                                                                                                                                                                                                                                                                                                        | Number<br>of ticks                   | Tick<br>Species      | Source                       |
|--------------------------------|------------------------------------------------------|-------------------------------------------------------------------------------------------------------------------------------------------------------------------------------------------------------------------------------------------------------------------------------------------------------------------------------------------------------------------------------------------------------------------------------------------------|--------------------------------------|----------------------|------------------------------|
| 2012<br>(NA)                   | Six sites (Hungary)                                  | 29 genera, including <i>Staphylococcus</i> , <i>Micrococcus</i> , <i>Bacillus</i> , <i>Oceanobacillus</i> , <i>Corynebacterium</i> , <i>Propionibacterium</i> , <i>Streptococcus</i> , <i>Streptomyces</i> , <i>Pseudomonas</i> , <i>Sphingomonas</i>                                                                                                                                                                                           | 52 T.<br>(45 L., 19 N., 8 A.)        | <i>I. ricinus</i>    | Egyed and Makrai (2014)      |
| < 1998<br>(Spring, Summer)     | Beltsville, MD (United States)                       | Seven <i>Bacillus</i> species including <i>B. thuringiensis</i> , <i>B. brevis</i> , and <i>B. sphaericus</i> , <i>Corynebacterium pseudodiphtheriticum</i> , <i>Kluyvermonas ascorbata</i>                                                                                                                                                                                                                                                     | 43 T.<br>(16 N., 27 A.)              | <i>I. scapularis</i> | Martin and Schmidtman (1998) |
| < 2003<br>(NA)                 | NA (Australia)                                       | <i>Stenotrophomonas</i> , <i>Staphylococcus</i> , <i>Pseudomonas</i> , <i>Acinetobacter</i> , <i>Bacillus</i> .                                                                                                                                                                                                                                                                                                                                 | 21 T.<br>(5 <i>Ixodes</i> )          | <i>I. holocyclus</i> | Murrell et al. (2003)        |
| < 2012<br>(Spring, Summer)     | Forest region in Silesia (Poland)                    | <i>Acinetobacter lwoffii</i> , <i>Pseudomonas "uorescens"</i> , <i>Aeromonas hydrophila</i> , <i>Achromobacter denitrificans</i> , <i>Alcaligenes faecalis</i> , <i>Stenotrophomonas maltophilia</i> , <i>Pseudomonas oryzae</i> , <i>Micrococcus</i> spp., <i>Kocuria varians</i> , <i>Staphylococcus lentus</i> , <i>Kocuria kristinae</i> , <i>Streptococcus pneumoniae</i> , <i>Rhizobium radiobacter</i> , <i>Staphylococcus xylosum</i> . | 36 T. (27 F., 9 M.)                  | <i>I. ricinus</i>    | Okła et al. (2012)           |
| 2006, 2007<br>(Spring, Autumn) | Valtice, Obora Soutok and Havraníky (Czech Republic) | - predominantly: <i>Bacillus</i> and <i>Paenibacillus</i> .<br>- frequent: <i>Arthrobacter</i> , <i>Corynebacterium</i> , <i>Frigoribacterium</i> , <i>Kocuria</i> , <i>Microbacterium</i> , <i>Micrococcus</i> , <i>Plantibacter</i> , <i>Rhodococcus</i> , <i>Rothia</i> , and <i>Staphylococcus</i><br>- less frequent: <i>Advenella</i> , <i>Pseudomonas</i> , <i>Rahnella</i> , <i>Stenotrophomonas</i> , <i>Xanthomonas</i> .             | 42 T.<br>(5 L., 10 N., 14 M., 13 F.) | <i>I. ricinus</i>    | Rudolf et al. (2009)         |
| 2003, 2004<br>(Spring)         | Six mixed woodlands (Poland)                         | <i>Pasteurella Pneumotropica</i> / <i>haemolytica</i> , <i>Pantoea agglomerans</i> , <i>Serratia marcescens</i> , <i>Serratia plymuthica</i> , <i>Aeromonas hydrophila</i> , <i>Burkholderia cepacia</i> , <i>Chromobacterium violaceum</i> , <i>Pseudomonas aeruginosa</i> , <i>Stenotrophomonas maltophilia</i>                                                                                                                               | 372 T.<br>(149 N., 101 F., 122 M.)   | <i>I. ricinus</i>    | Stojek and Dutkiewicz (2004) |
